# Supplementary material for: Clinical and Biological Subtypes of B-cell Lymphoma Revealed by Microenvironmental Signatures
Source: Oxford University Press journal article supplement (doi:10.1158/2159-8290.cd-20-0839), 2021-02-04
Supplement: 21598290cd200839-sup-245242_2_supp_6850052_qmzvl3.xlsx [file 21598290cd200839-sup-245242_2_supp_6850052_qmzvl3.xlsx]

## Sheet: Table S1
FGES	Description	Geneset
LEC	Lymphatic endothelium	JAM3	PPP1R13B	CXCL12	PDPN	CXADR	FLT4	CCL21	FOXC2	EDNRB	LYVE1	PROX1	SOX18	JAM2
VEC	Angiogenesis	CDH5	PGF	PDGFC	TEK	VEGFC	CXCL8	VWF	CXCR2	ANGPT1	CXCL5	FLT1	VEGFA	KDR	VEGFB	ANGPT2
CAF	Cancer Associated Fibroblasts	COL1A1	MMP2	LGALS1	MMP7	LRP1	CD248	S100A4	FAP	FGF2	MMP9	CTGF	ACTA2	FN1	COL1A2	COL5A1	COL6A1	MMP3	CA9	PRELP	FBLN1	COL6A3	COL11A1	TGFB3	MMP12	MFAP5	MMP1	COL6A2	TIMP1	COL4A1	TGFB1	LUM	LGALS9	PTGS2	TGFB2
FRC	Fibroblastic reticular cells	PDGFRA	ACTA2	ICAM1	NT5E	VIM	PDPN	THY1	DES	VCAM1	PTGS2	LTBR
ECM	Matrix	COL1A1	COL3A1	LGALS7	FN1	VTN	COL1A2	COL4A1
ECM remodeling	Matrix remodeling	TIMP1	TIMP2	MMP2	MMP9	CA9
granulocyte traffic	Granulocyte traffic	KITLG	CXCL8	CXCR1	CXCR2	CXCL5	KIT	CCL11	CCR3	CXCL1	CXCL2
IS cytokines	Protumor cytokines	CCL4	IL6	TNFSF13B	MIF	CXCL8	IL22	IL10
FDC	Follicular dendritic cells	PDPN	TNFRSF1A	LTBR	FDCSP	CLU	PRNP	BST1
macrophages	Macrophages	IL10	MSR1	ARG1	CSF1R	CD163	MRC1	CSF1
activated M1	M1 signature	TNF	NOS2	IL1B	CMKLR1
T cells traffic	Effector cell traffic	CXCL11	CXCL10	CXCL9	CXCR3	CX3CL1	CCL5	CX3CR1
MHC-II	MHCII	HLA-DQB1	HLA-DPB1	HLA-DPA1	HLA-DRA	HLA-DQA1	HLA-DMA	HLA-DRB1	HLA-DMB
MHC-I	MHCI	TAP1	HLA-C	B2M	HLA-B	HLA-A	TAP2
TFH	Follicular B helper T cells	CD40LG	SH2D1A	CD84	CXCR5	IL4	IL6	MAF	BCL6	IL21	ICOS
Treg	Treg	CCR8	CTLA4	IKZF2	IKZF4	FOXP3	IL10	TNFRSF18
TIL	T cells	CD3D	TRAT1	TBX21	TRBC2	ITK	CD28	CD3E	TRBC1	TRAC	CD3G
IS checkpoints	Checkpoint inhibition	CTLA4	HAVCR2	CD274	PDCD1	BTLA	TIGIT	PDCD1LG2	LAG3
NK	NK cells	SH2D1B	GZMH	GZMB	CD160	KLRK1	NCR3	CD244	IFNG	GNLY	NCR1	CD226	NKG7	EOMES	KLRC2	FGFBP2	KIR2DL4	KLRF1
B cells traffic	B cell traffic	CXCL13	CXCR5	CCR6	CCL20
B cells	Benign B cells	CD79B	MS4A1	STAP1	TNFRSF17	CD24	CD22	TNFRSF13B	BLK	CD19	PAX5	CD79A	TNFRSF13C	FCRL5
cell proliferation	Tumor proliferation rate	MCM6	AURKB	ESCO2	CCNB1	AURKA	MKI67	CCND1	CCNE1	MCM2	MYBL2	E2F1	CETN3	CDK2	PLK1	BUB1
NFkB	Canoninal pathway	PROGENY
PI3K	Canoninal pathway	PROGENY
p53	Canoninal pathway	PROGENY

## Sheet: Table S2
COO genes	Shap importance
ITPKB	1.198
MYBL1	1.15
LMO2	0.93
IRF4	0.94
LRMP	0.71
CCND2	0.7
BATF	0.66
SP140	0.52
SPINK2	0.54
TCF4	0.41
CSTB	0.41
PIM1	0.32
VCL	0.3
GPR18	0.24
FUT8	0.22
BCL2	0.28
SLA	0.24
RPL21	0.2
P2RX5	0.11
REL	0.12
HLA-DQA1	0.13
CSNK1E	0.16
PTPN1	0.05
KRT8	0.15
IGHM	0.13
PRKCB1	0.11
GOT2	0.11
FAM3C	0.07
SPIB	0.09
ACP1	0.06
PIM2	0.04
PLEK	0.06

## Sheet: Table S3
DHIT genes	Shap importance
SEMA7A	0.64
AFMID	0.37
EBI3	0.13
SGPP2	0.42
FAM216A	0.08
PEG10	0.33
TACC1	0.17
OR13A1	0.26
SMIM14	0.19
BATF	0.3
IL21R	0.53
NMRAL1	0.21
FHIT	0.35
EIF4EBP3	0.1
GNG2	0.2
HAGHL	0.02
IRF4	0.07
ANKRD33B	0.34
STAT3	0.06
SLC25A27	0.08

## Sheet: Table S4
Gene (mutations)	GC-LME	MS-LME	IN-LME	DP-LME	ABC	GCB	Fisher_LME_lg	Fisher_COO_lg	Chi2_LME_lg
TNFRSF14	23.71134021	15.2892562	15.02590674	13.95348837	7.9	29.4	1.442865783	13.48972065	0.2231205263
SOCS1	18.55670103	17.76859504	16.58031088	11.62790698	9.8	25.8	0.3418596333	7.861821482	0.2345699437
EBF1	17.5257732	9.504132231	6.735751295	8.837209302	6.6	14.7	2.055371218	3.326600573	0.7900620272
SPEN	14.43298969	8.26446281	11.39896373	8.837209302	10.5	9.3	0.8380357485	0.1511799672	0.2905366222
IRF8	14.43298969	11.15702479	12.43523316	6.976744186	7.3	16.5	0.6630228744	3.89476791	0.4205080142
FOXO1	11.34020619	9.917355372	5.699481865	9.76744186	6.2	13.6	0.4599912601	3.07138191	0.365995893
NFKBIE	11.34020619	9.917355372	5.699481865	6.511627907	6.4	10.8	0.6444254875	1.425434279	0.3484648412
BCL7A	11.34020619	8.26446281	7.772020725	10.23255814	4.5	16.8	0.3491808149	7.538644237	0.1528959539
ZC3H12A	9.278350515	7.438016529	5.699481865	5.11627907	8.8	2.9	0.570483717	2.911313797	0.1036074985
MYC	9.278350515	6.198347107	7.772020725	8.837209302	6.6	9.7	0.2659472252	0.8036057586	0.2042533878
CD83	9.278350515	4.132231405	6.21761658	2.325581395	3.4	7.2	1.40617589	1.487381964	0.9550381252
STAT6	8.24742268	2.479338843	3.10880829	3.720930233	1.7	7.2	1.690423736	3.636538637	0.7429590018
DDX3X	7.216494845	4.958677686	4.663212435	5.581395349	3.2	9.0	0.4674812201	2.933539534	0.04420810827
S1PR2	6.18556701	3.719008264	2.07253886	3.255813953	0.6	8.2	0.8753324887	7.218150979	0.2675292012
TCF3	5.154639175	2.479338843	2.07253886	0.9302325581	2.4	2.2	1.241026588	0	0.5608910148
IL4R	5.154639175	4.132231405	2.07253886	0.9302325581	1.7	4.7	0.7549767406	1.650109431	0.7772778737
CD74	4.12371134	2.479338843	0.518134715	0.9302325581	1.1	2.9	1.12128357	1.072861496	0.7742634794
NFKBIZ	3.092783505	2.479338843	2.07253886	1.395348837	2.4	1.8	0.3461445949	0.09948587293	0.05118275838
FCGR2B	2.06185567	1.652892562	0.518134715	1.860465116	0.6	2.9	0.191797967	1.625825751	0.1821971646
MS4A1	2.06185567	1.652892562	1.03626943	1.860465116	1.5	1.8	0.1795809106	0.1136531439	0.0426057212
KMT2D	34.02061856	36.7768595	32.12435233	36.74418605	35.0	35.5	0.2465154326	0.0282938272	0.2847192477
B2M	8.24742268	23.96694215	13.47150259	17.20930233	13.7	23.3	2.896643182	3.026605987	2.388312482
CREBBP	13.40206186	22.72727273	16.06217617	20.93023256	15.2	26.2	0.948279878	3.439794274	0.984207404
TNFAIP3	12.37113402	21.90082645	15.02590674	13.48837209	17.5	14.7	2.087720703	0.445043374	1.016036239
BCL6	11.34020619	20.66115702	20.20725389	18.60465116	19.4	17.6	0.4341730023	0.2505782398	0.8585624563
BTG2	16.49484536	20.66115702	19.17098446	18.13953488	21.4	15.1	0.3695413723	1.464927502	0.1649489812
SGK1	13.40206186	19.4214876	9.32642487	9.76744186	6.2	25.1	3.098475959	12.18404182	1.58215847
CARD11	9.278350515	19.00826446	12.43523316	15.81395349	14.7	15.8	1.308136287	0.1239611371	1.075334689
GNA13	4.12371134	16.11570248	4.663212435	9.76744186	3.4	20.4	3.96802506	13.01206908	3.378214342
P2RY8	9.278350515	15.2892562	6.21761658	6.046511628	4.9	17.2	3.528621054	7.211651356	2.055454979
CD58	9.278350515	12.39669421	11.91709845	11.1627907	12.8	9.3	0.2042114103	0.8051802872	0.1421082668
KLHL6	9.278350515	11.98347107	11.91709845	10.23255814	9.2	14.3	0.2078615509	1.395865469	0.1254171303
HIST1H1C	8.24742268	11.98347107	9.844559585	9.76744186	9.2	12.2	0.5150653832	0.6698623759	0.1671673381
ARID1A	8.24742268	11.98347107	7.772020725	10.69767442	9.0	11.8	0.6160217865	0.6757483543	0.3643928742
STAT3	8.24742268	11.57024793	9.32642487	9.76744186	8.1	13.3	0.440075626	1.497705212	0.1440079683
UBE2A	2.06185567	10.74380165	5.699481865	7.906976744	9.0	5.0	1.595680256	1.214900848	1.467017909
TET2	4.12371134	10.74380165	9.844559585	6.046511628	6.4	11.5	0.927410084	1.713280702	0.937427978
CCND3	8.24742268	10.74380165	10.3626943	10.69767442	11.5	8.2	0.09811157566	0.7648479395	0.1443613543
CIITA	3.092783505	9.504132231	7.25388601	6.511627907	5.6	10.0	1.003484392	1.553910741	0.6923295191
GNAI2	6.18556701	7.024793388	5.18134715	4.186046512	3.0	10.0	0.5113776495	3.982908876	0.1157664828
KMT2C	6.18556701	7.024793388	2.590673575	5.581395349	4.9	6.1	0.7757804002	0.2970025087	0.5297163433
BIRC6	6.18556701	7.024793388	4.14507772	5.11627907	4.5	7.5	0.5113776495	1.000280571	0.1346619172
ATM	4.12371134	6.611570248	3.626943005	1.395348837	3.2	5.4	1.785362157	0.7518702493	1.119847126
BTK	0	6.198347107	1.03626943	5.11627907	2.8	5.4	1.658902591	1.119080914	2.306624859
UBR5	3.092783505	5.371900826	2.590673575	3.720930233	3.0	5.4	0.7997166941	0.9273889195	0.2879743798
SETD2	3.092783505	5.371900826	2.07253886	2.790697674	4.3	2.2	1.244206577	0.8220247217	0.4928967654
FBXO11	2.06185567	4.545454545	1.554404145	2.790697674	1.1	6.1	0.9877986657	3.799889993	0.4939348711
RHOA	1.030927835	4.545454545	4.14507772	4.186046512	2.8	5.7	0.2628529441	1.29609649	0.4085078156
PRKCD	2.06185567	3.719008264	3.10880829	1.395348837	1.9	3.9	0.6342312608	0.9744791326	0.3036477089
CD44	1.030927835	2.892561983	0	1.395348837	1.7	1.1	1.346182062	0.1220948149	0.9636957465
HIST1H3B	1.030927835	2.479338843	0.518134715	1.395348837	1.5	1.4	0.7217022598	0	0.3848135046
HIST1H1E	14.43298969	16.52892562	19.68911917	15.81395349	15.6	19.0	0.6541009923	0.5743164091	0.3390247927
BTG1	15.46391753	11.98347107	18.65284974	15.81395349	17.1	12.2	0.8793666541	1.127768205	0.6990630581
CD79B	5.154639175	11.57024793	17.61658031	15.81395349	20.1	2.5	1.179719289	13.02739689	2.209495171
MPEG1	9.278350515	4.545454545	15.02590674	7.906976744	12.0	3.6	2.998982844	4.295008937	2.726515049
FAS	11.34020619	12.39669421	12.95336788	7.441860465	8.5	15.1	0.4571716183	2.121395761	0.4026465599
IRF4	6.18556701	8.67768595	12.43523316	10.69767442	12.2	6.1	0.6836322225	2.121650306	0.7506673372
PRDM1	6.18556701	8.26446281	11.91709845	11.1627907	14.7	1.4	0.5839690698	10.18343127	0.7928095605
CD70	5.154639175	9.090909091	9.844559585	7.441860465	8.5	7.9	0.436698836	0.1047481814	0.3769196943
NFKBIA	4.12371134	4.958677686	8.808290155	5.11627907	3.8	9.3	1.287287916	2.470302617	0.7187234235
PIM2	2.06185567	4.545454545	8.29015544	5.11627907	8.5	0.0	1.381214038	8.202921904	1.064425636
RB1	2.06185567	4.132231405	6.21761658	4.651162791	3.4	6.5	0.6420413963	1.163040002	0.495217244
PCLO	4.12371134	5.371900826	5.699481865	4.186046512	2.8	8.6	0.2465914153	3.154427642	0.07786361092
ID3	2.06185567	4.545454545	5.18134715	4.186046512	4.3	4.3	0.2712649863	0	0.262035896
NOTCH1	4.12371134	1.652892562	5.18134715	1.860465116	4.5	0.4	1.34100325	3.263006041	0.9368346213
ARID5B	2.06185567	1.652892562	5.18134715	1.860465116	3.2	1.8	1.732069803	0.4568969754	1.081783586
CD274	3.092783505	4.545454545	5.18134715	1.860465116	3.2	4.7	0.5693208566	0.4887082359	0.4996397981
NLRC5	4.12371134	2.066115702	5.18134715	5.11627907	4.1	3.9	0.4049361305	0	0.6622923672
CXCR4	3.092783505	3.719008264	4.663212435	1.860465116	3.0	3.9	0.6051834441	0.2752435584	0.3187853522
PIM1	16.49484536	25.20661157	27.97927461	35.81395349	34.8	16.1	2.544482307	7.688732353	3.025547374
MYD88	13.40206186	21.90082645	23.31606218	32.55813953	33.8	8.2	3.023005967	15.9510849	3.27937087
TP53	18.55670103	28.09917355	19.68911917	29.30232558	25.4	24.4	1.029392305	0.1004018364	1.538803213
MEF2B	6.18556701	11.57024793	12.95336788	17.6744186	9.4	19.0	1.661000116	3.552114279	1.944938903
BCL2	11.34020619	16.11570248	10.88082902	16.27906977	7.1	26.2	0.5239507456	11.78818665	0.6826288007
EP300	5.154639175	8.67768595	5.18134715	13.48837209	7.7	10.4	2.225964812	0.6427201902	2.216696239
EZH2	11.34020619	11.57024793	6.21761658	13.48837209	4.1	21.9	0.9240258038	13.11636866	0.9621531285
TMEM30A	1.030927835	10.33057851	5.18134715	12.09302326	9.2	6.8	1.710189117	0.559854744	2.854607566
ETV6	5.154639175	6.611570248	11.39896373	11.62790698	12.8	2.9	0.7980147399	5.879288146	1.433373812
POU2F2	1.030927835	9.090909091	8.29015544	9.302325581	8.5	6.8	0.430704177	0.3156538008	1.414966457
GRHPR	0	3.719008264	7.25388601	8.372093023	7.9	1.4	1.47687835	4.068840397	2.437037065
FAT4	5.154639175	5.785123967	5.699481865	6.976744186	3.0	11.1	0.3020313254	4.956499492	0.1259445478
SMARCA4	1.030927835	3.305785124	2.590673575	4.651162791	3.6	2.5	0.7663658581	0.2829598487	0.5840033158
USP7	1.030927835	4.545454545	0.518134715	4.651162791	1.3	6.1	0.8026848347	3.223569724	1.635174815
XPO1	3.092783505	2.892561983	1.554404145	4.186046512	1.7	5.0	0.6340240269	1.884842131	0.3767723794
CD22	1.030927835	2.066115702	0	2.325581395	0.9	2.5	0.5072215367	0.9512737827	0.7518502622

## Sheet: Table S5
Gene (CNA)	GC-LME	MS-LME	IN-LME	DP-LME	ABC	GCB	Fisher_LME_lg	Fisher_COO_lg	Chi2_LME_lg
BCL6	38.0	23.9	33.7	36.7	40.4	16.7	0.78	11.11	1.52
PIK3CA	38.0	22.3	33.7	36.2	41.2	13.3	0.88	15.52	1.88
HSF1	28.0	20.3	12.2	18.3	14.6	26.3	1.73	3.87	1.31
B2M	28.0	27.5	22.7	24.8	20.2	35.2	0.27	4.93	0.18
TNFRSF14	28.0	17.9	23.2	20.2	17.1	28.5	1.06	3.42	0.26
FOXP1	27.0	13.9	19.9	25.2	28.1	6.7	1.08	12.94	1.87
MYC	26.0	18.7	12.7	20.6	14.8	25.9	1.27	3.53	1.12
RFX7	21.0	12.4	8.3	15.6	10.0	19.6	1.58	3.48	1.45
ARID1A	21.0	14.3	18.8	16.1	14.8	20.4	0.6	1.27	0.14
ATP6V1B2	19.0	13.1	16.6	17.9	17.1	14.4	0.42	0.39	0.36
ID3	19.0	13.9	18.2	14.7	13.8	19.6	0.42	1.43	0.09
CD70	19.0	16.7	14.9	18.3	17.5	16.3	0.24	0.12	0.21
UNC5D	18.0	9.2	9.9	12.8	12.1	10.7	1.37	0.2	0.73
UNC5C	15.0	9.2	10.5	14.2	10.2	14.4	0.5	1.01	0.65
TRAF3	13.0	11.6	11.6	12.8	13.8	9.3	0.13	1.09	0.07
TLR2	12.0	12.0	7.2	11.0	7.5	15.9	0.22	3.33	0.45
CXCR4	12.0	9.2	8.8	11.5	10.8	8.9	0.32	0.35	0.21
POU2AF1	17.0	28.7	14.4	28.4	22.5	25.6	1.64	0.43	3.43
BIRC3	16.0	25.5	12.7	23.9	19.6	22.6	1.66	0.46	2.6
BTG1	21.0	24.7	18.2	23.4	17.7	30.4	0.58	4.09	0.6
ADAMTS12	14.0	19.9	17.7	19.7	16.5	22.2	0.31	1.2	0.51
CD44	13.0	16.3	8.3	12.4	9.4	18.9	1.31	3.6	0.99
FOXC1	20.0	17.1	24.3	21.6	21.0	19.6	0.77	0.15	0.45
IRF4	22.0	17.9	24.3	22.0	21.5	20.7	0.6	0.07	0.31
BAK1	19.0	15.5	22.1	18.3	18.5	18.1	0.82	0.04	0.28
CCND3	18.0	17.9	21.5	18.8	20.4	16.7	0.48	0.61	0.11
CD83	19.0	15.1	21.5	20.6	19.4	17.8	0.56	0.2	0.52
PIM1	20.0	16.7	21.0	19.7	19.6	18.1	0.35	0.16	0.16
CD274	8.0	18.3	19.9	18.3	17.3	17.4	0.51	-0.0	1.33
ZC3H12A	15.0	12.7	19.3	14.2	14.4	16.3	1.13	0.28	0.34
JAK2	10.0	17.5	18.8	18.3	16.7	17.8	0.3	0.16	0.84
NFKBIE	15.0	16.3	18.2	17.0	17.3	15.9	0.24	0.16	0.12
SPEN	15.0	12.0	17.1	14.2	12.1	18.1	0.65	1.53	0.21
SMARCA4	10.0	7.2	14.4	12.4	11.5	9.6	1.01	0.33	0.99
CDKN2C	12.0	12.0	13.8	13.8	11.0	16.3	0.15	1.38	0.12
IGLL5	3.0	5.2	7.7	6.9	7.1	4.1	0.55	0.96	0.52
PRDM1	24.0	39.8	32.0	47.7	44.6	26.7	3.17	5.95	3.93
MALT1	33.0	27.5	37.0	46.8	45.8	18.9	3.8	13.26	3.4
BCL2	33.0	25.9	35.9	45.9	45.4	16.7	4.0	15.42	3.59
TNFAIP3	28.0	43.0	27.6	45.9	41.7	31.9	2.2	2.1	3.86
SGK1	27.0	39.4	24.9	44.0	38.3	30.7	2.61	1.41	3.94
CDKN2A	21.0	25.9	34.8	44.0	40.8	18.1	4.45	9.99	4.6
DSEL	33.0	23.1	35.9	43.6	43.8	15.2	3.62	15.53	3.73
TMEM30A	17.0	28.7	19.9	35.3	29.8	21.9	2.96	1.69	3.76
ARID1B	19.0	27.9	18.8	35.3	28.1	24.1	3.12	0.58	3.67
SPIB	5.0	15.9	23.8	34.9	29.6	8.1	6.97	12.0	8.57
CD36	25.0	28.3	19.9	33.9	23.3	34.8	1.93	3.06	2.19
BAX	5.0	12.7	20.4	31.7	26.0	6.7	7.18	11.05	8.43
BTG2	27.0	28.7	24.3	31.7	24.8	34.4	0.68	2.27	0.74
CARD11	26.0	29.5	23.8	31.2	24.6	34.4	0.61	2.29	0.83
MCL1	27.0	25.1	22.1	30.7	23.1	31.9	1.08	1.92	0.93
EZH2	22.0	23.9	19.9	30.7	22.5	28.5	1.81	1.11	1.65
ETS1	22.0	29.5	16.6	30.3	25.4	25.9	1.18	0.03	2.55
KMT2C	22.0	23.9	20.4	30.3	22.7	28.1	1.6	0.95	1.44
TP53	18.0	23.9	24.9	28.4	27.1	20.4	0.87	1.37	1.05
STAT6	25.0	27.9	19.9	28.4	19.6	36.7	0.51	6.23	1.0
XPO1	22.0	21.9	11.6	26.6	14.2	32.6	1.87	8.16	2.73
MYD88	23.0	16.3	23.2	24.3	28.5	8.1	0.7	11.27	0.83
CD58	16.0	20.7	19.3	22.0	21.0	18.5	0.37	0.35	0.5
PAX5	8.0	17.5	17.7	20.2	17.1	17.0	0.78	-0.0	1.58
TOX	18.0	12.0	12.7	19.3	17.1	11.5	1.36	1.36	1.17
TNFSF9	18.0	16.7	14.4	18.3	16.9	16.7	0.29	-0.0	0.27
NOTCH1	11.0	14.3	13.3	15.6	13.8	14.4	0.38	0.08	0.38
ZEB2	13.0	9.6	9.9	15.1	13.8	8.1	1.1	1.61	0.85
DNMT1	11.0	8.0	11.6	12.8	10.6	10.7	0.62	-0.0	0.54

## Sheet: Table S6
Hypomethylated and Upregulated	Hypermethylated and Downregulated	GOID	GOTerm	Ontology Source	Term PValue	Term PValue Corrected with Bonferroni step down	Group PValue	Group PValue Corrected with Bonferroni step down	GOLevels	GOGroups	% Associated Genes	Nr. Genes	Associated Genes Found
1700028K03Rik	Rpl3	GO:0002286	T cell activation involved in immune response	GO_BiologicalProcess-EBI-UniProt-GOA_27.02.2019_00h00	2.024e-05	0.0282349	2.024e-05	6.07201e-05	[5, 6]	Group00	13.0081	16	[BCL3, BGLAP, CD80, FCGR2A, FCGR2B, FCGR2C, FOXP3, IL23A, LOXL3, MTOR, NFKBID, NFKBIZ, RARA, SLC12A3, STAT3, ZC3H12A]
1700029P11Rik		GO:0010830	regulation of myotube differentiation	GO_BiologicalProcess-EBI-UniProt-GOA_27.02.2019_00h00	1.3325e-05	0.0186416	1.3325e-05	6.66248e-05	[6, 7]	Group01	17.1429	12	[BHLHA15, EHD1, FLOT1, LMOD3, MTOR, NFATC2, NOTCH1, PLPP7, RBM24, SHOX2, SIK1, SIK1B]
1700080O16Rik		GO:0007162	negative regulation of cell adhesion	GO_BiologicalProcess-EBI-UniProt-GOA_27.02.2019_00h00	3.30974e-06	0.00466011	3.30974e-06	2.97876e-05	[3, 4, 5]	Group02	9.375	33	[ADAM22, ADTRP, BGLAP, C1QTNF1, CARD14, CD80, CDSN, CORO2B, CREBBP, CRISP2, CYP1B1, DNAAF3, FCGR2A, FCGR2B, FCGR2C, FOXP3, GPNMB, IL10, IL1RN, IL2RA, LOXL3, MMEL1, NCOA1, NFKBID, NOTCH1, PLXNC1, RUNX3, SH2B3, SLPI, SRC, SYNGAP1, TGFBI, ZC3H12A]
2700081O15Rik		GO:0019722	calcium-mediated signaling	GO_BiologicalProcess-EBI-UniProt-GOA_27.02.2019_00h00	2.73409e-05	0.0379765	2.73409e-05	2.73409e-05	[5, 6, 7]	Group03	9.15033	28	[ACKR2, ADGRL1, ATP1B1, BHLHA15, CARD14, CCR6, CD22, CXCR2, CXCR5, HAP1, HIVEP1, IRGM, ITPR1, ITPR2, JSRP1, MTOR, NFAT5, NFATC2, NOS1, NR5A1, PDK2, PLCG1, PLEK, RCAN3, RHOV, RYR3, SYK, TRPM4]
4930523C07Rik		GO:0006811	ion transport	GO_BiologicalProcess-EBI-UniProt-GOA_27.02.2019_00h00	8.4489e-06	0.0118622	8.4489e-06	6.75912e-05	[4]	Group04	5.7226	118	[ABCC1, ABCC2, ACACB, ANO5, ANO7, ANO9, APOE, ARHGEF40, ASPA, ATP1B1, ATP2A3, ATP6V0A1, ATP8B2, ATP9A, BGLAP, BHLHA15, CA4, CACNA1H, CACNA1S, CACNA2D4, CACNB3, CACNG7, CARD14, CASR, CHD7, CHRNB4, CLCA1, CLCN5, CLCNKA, CLCNKB, COX6A2, CRISP2, CYB5R2, ENTHD1, EPX, FGF23, FLOT1, GEM, GPNMB, GPR35, GRAMD2A, GRIK5, HAMP, HAP1, HNF1A, HVCN1, ITPR1, ITPR2, JSRP1, KCNAB3, KCNJ15, KCNK2, KCNK6, KCNMA1, KL…
4930539E08Rik		GO:0043318	negative regulation of cytotoxic T cell degranulation	GO_BiologicalProcess-EBI-UniProt-GOA_27.02.2019_00h00	1.05931e-05	0.0148622	1.05931e-05	7.4152e-05	[5, 6, 7, 8, 9, 10, 11]	Group05	80	4	[BGLAP, FCGR2A, FCGR2B, FCGR2C]
8030474K03Rik		GO:0034097	response to cytokine	GO_BiologicalProcess-EBI-UniProt-GOA_27.02.2019_00h00	1.82436e-05	0.0254681	1.44716e-05	5.78866e-05	[4]	Group06	6.0225	91	[ACKR2, ADAMTS13, ADAR, ARID5B, BGLAP, CARD14, CCL17, CCR6, CD300LF, CD38, CD40, CD80, CHCHD4, CIITA, CPN1, CRISP2, CSF2RB, CXCR2, CXCR5, DDX58, EBI3, EDARADD, EPX, FGF23, FOS, GBA, GBP6, GPR35, HAMP, HNF1A, IKBKB, IL10, IL1R2, IL1RN, IL23A, IL2RA, ILDR1, IRAK2, IRGM, JARID2, KAT6B, LAPTM5, LRCH1, LRSAM1, MID1, MX1, MYLK2, MYO1A, NCOA1, NFAT5, NPR2, OAS3, OASL, OSM, PCYT1A, PDE1B, PIAS3, PLA2G5, …
Abcc1		GO:0071310	cellular response to organic substance	GO_BiologicalProcess-EBI-UniProt-GOA_27.02.2019_00h00	3.03774e-05	0.0421335	1.44716e-05	5.78866e-05	[4]	Group06	5.17189	170	[ACKR2, ADAMTS13, ADAR, ADCY7, ADTRP, AKAP13, ARHGEF18, ARID5B, ASPA, ATF3, ATP6V0A1, BAIAP2L1, BCL9L, BGLAP, BHLHA15, CACNA1H, CACNA1S, CALCOCO1, CARD14, CASR, CASTOR2, CASTOR3, CCL17, CCR6, CD300LF, CD40, CD80, CHCHD4, CIITA, CORO7, CPN1, CREBBP, CRISP2, CSF2RB, CXCR2, CXCR5, CYP1B1, DDX58, DLL1, DNMT3A, EBI3, EDARADD, EDEM1, EGR2, EHD1, EPX, FCGR2A, FCGR2B, FCGR2C, FES, FGF23, FLOT1, FOS, FRS3…
Abcc10		GO:0035556	intracellular signal transduction	GO_BiologicalProcess-EBI-UniProt-GOA_27.02.2019_00h00	7.68021e-07	0.00108752	7.68021e-07	9.21626e-06	[3, 4, 5]	Group07	5.37947	185	[ACKR2, ADCY7, ADGRL1, ADTRP, AKAP13, ALPK1, APOE, ARFGEF3, ARHGAP25, ARHGAP4, ARHGEF10, ARHGEF12, ARHGEF18, ARHGEF40, ARID3A, ATF3, ATP1B1, BCAR3, BCL3, BGLAP, BHLHA15, C15orf62, C1QTNF1, CARD14, CASR, CASTOR2, CASTOR3, CBLC, CCL17, CCR6, CD22, CD40, CD80, CDC42BPG, CHD3, CHD4, CHD6, CNKSR1, CPN1, CREBBP, CRISP2, CRTC3, CSF2RB, CXCR2, CXCR5, CYP1B1, DDX58, DENND4B, DGKQ, DHX58, DNAAF3, DPEP3, DU…
Abcc2		GO:1902531	regulation of intracellular signal transduction	GO_BiologicalProcess-EBI-UniProt-GOA_27.02.2019_00h00	1.52095e-07	0.000215975	7.68021e-07	9.21626e-06	[4, 5, 6]	Group07	5.94876	137	[AKAP13, ALPK1, APOE, ARFGEF3, ARHGAP25, ARHGAP4, ARHGEF10, ARHGEF12, ARHGEF18, ARHGEF40, ATF3, BCL3, BGLAP, C1QTNF1, CARD14, CASR, CASTOR2, CASTOR3, CBLC, CCL17, CD22, CD40, CD80, CHD3, CHD4, CHD6, CNKSR1, CPN1, CRISP2, CRTC3, DENND4B, DGKQ, DHX58, DPEP3, DUSP16, EGR2, EPX, FBRS, FCGR2A, FCGR2B, FCGR2C, FGD4, FGF23, FLOT1, GBA, GPNMB, GPR35, GPR4, GRIK5, HAP1, HIVEP1, HYOU1, IKBKB, IL1RN, IL23A,…
Abhd4		GO:0043046	DNA methylation involved in gamete generation	GO_BiologicalProcess-EBI-UniProt-GOA_27.02.2019_00h00	9.23427e-07	0.0013048	3.14777e-08	4.0921e-07	[3, 4, 5, 6, 7, 8, 9, 10]	Group08	36.3636	8	[DNMT3A, DNMT3L, FKBP6, MAEL, MOV10L1, PIWIL2, PIWIL4, TDRD9]
Abhd6		GO:0034587	piRNA metabolic process	GO_BiologicalProcess-EBI-UniProt-GOA_27.02.2019_00h00	2.41911e-07	0.000343272	3.14777e-08	4.0921e-07	[7, 8]	Group08	42.1053	8	[BTBD18, FKBP6, GPAT2, MAEL, MOV10L1, PIWIL2, PIWIL4, TDRD9]
Ablim2		GO:0048518	positive regulation of biological process	GO_BiologicalProcess-EBI-UniProt-GOA_27.02.2019_00h00	1.07338e-05	0.0150489	1.07338e-05	6.44031e-05	[1, 2, 3]	Group09	4.64886	329	[ABCC1, ABHD6, ACACB, ACHE, ADAMTSL4, ADAR, ADCY7, ADGRL1, ADTRP, AGO2, AIRE, AKAP13, ALDH1A3, ALPK1, ANKIB1, APOE, ARFGEF3, ARHGAP4, ARHGEF10, ARHGEF12, ARHGEF18, ARID3A, ARID3B, ARID5B, ASPA, ATF3, ATP1B1, AVIL, BAIAP2L1, BCAR3, BCL3, BCL9L, BGLAP, BHLHA15, BICRA, BTBD18, C15orf62, C1QTNF1, CACNA1H, CACNB3, CACNG7, CALCOCO1, CARD14, CASR, CCDC169-SOHLH2, CCL17, CCND2, CCR6, CD22, CD300LF, CD38,…
Acacb		GO:0048522	positive regulation of cellular process	GO_BiologicalProcess-EBI-UniProt-GOA_27.02.2019_00h00	4.73947e-08	6.73953e-05	1.07338e-05	6.44031e-05	[2, 3, 4]	Group09	4.94875	309	[ABCC1, ACACB, ACHE, ADAMTSL4, ADCY7, ADGRL1, ADTRP, AGO2, AIRE, AKAP13, ALDH1A3, ALPK1, ANKIB1, APOE, ARFGEF3, ARHGAP4, ARHGEF10, ARHGEF12, ARHGEF18, ARID3A, ARID3B, ARID5B, ASPA, ATF3, AVIL, BAIAP2L1, BCAR3, BCL3, BCL9L, BGLAP, BHLHA15, BICRA, BTBD18, C15orf62, C1QTNF1, CACNA1H, CACNB3, CACNG7, CALCOCO1, CARD14, CASR, CCDC169-SOHLH2, CCL17, CCND2, CCR6, CD300LF, CD38, CD40, CD80, CHCHD4, CHD6, …
Ache		GO:0010941	regulation of cell death	GO_BiologicalProcess-EBI-UniProt-GOA_27.02.2019_00h00	8.56854e-07	0.00121245	8.56854e-07	9.42539e-06	[3, 4]	Group10	5.89875	127	[ADAMTSL4, AKAP13, ALDH1A3, ANO9, APOE, ARHGEF12, ARHGEF18, ASPA, ATF3, BCL3, CARD14, CCND2, CCR6, CD38, CD40, CDSN, CNKSR1, CREBBP, CRISP2, CXCR2, CYP1B1, DKKL1, DLL1, DNMT3A, EPX, FCGR2A, FCGR2B, FCGR2C, FGD4, FOS, GBA, GIMAP8, GPNMB, GRIK5, HAP1, HIVEP1, HNF1A, HYOU1, IKBKB, IKZF3, IL10, IMPACT, ITM2C, ITSN1, KALRN, KCNK2, KCNMA1, MAEL, MED12, MEIS3, MERTK, MPV17L, MRTFA, MST1, MTOR, MYO1A, NC…
Ackr2		GO:0060548	negative regulation of cell death	GO_BiologicalProcess-EBI-UniProt-GOA_27.02.2019_00h00	3.39791e-05	0.0470611	8.56854e-07	9.42539e-06	[3, 4, 5]	Group10	6.15858	80	[ANO9, APOE, ASPA, BCL3, CARD14, CCND2, CCR6, CD38, CDSN, CNKSR1, CRISP2, CXCR2, DLL1, EPX, GBA, GPNMB, GRIK5, HIVEP1, HNF1A, HYOU1, IKBKB, IL10, IMPACT, ITSN1, MAEL, MED12, MEIS3, MERTK, MPV17L, MRTFA, MST1, MTOR, MYO1A, NCOA1, NLRP4, NOTCH1, NR4A1, PARP3, PDK4, PIK3CG, PRAMEF1, PRAMEF10, PRAMEF11, PRAMEF12, PRAMEF13, PRAMEF14, PRAMEF15, PRAMEF17, PRAMEF18, PRAMEF19, PRAMEF2, PRAMEF20, PRAMEF25,…
Acox1		GO:0043067	regulation of programmed cell death	GO_BiologicalProcess-EBI-UniProt-GOA_27.02.2019_00h00	3.33665e-05	0.046246	8.56854e-07	9.42539e-06	[4, 5]	Group10	5.62531	112	[ADAMTSL4, AKAP13, ALDH1A3, ANO9, APOE, ARHGEF12, ARHGEF18, ASPA, ATF3, BCL3, CARD14, CCND2, CCR6, CD38, CD40, CDSN, CNKSR1, CREBBP, CRISP2, CXCR2, CYP1B1, DKKL1, DLL1, EPX, FGD4, GIMAP8, GRIK5, HAP1, HIVEP1, HNF1A, HYOU1, IKBKB, IKZF3, IL10, ITM2C, ITSN1, KALRN, KCNMA1, MAEL, MED12, MEIS3, MERTK, MPV17L, MRTFA, MST1, MTOR, MYO1A, NCOA1, NFKBID, NLRC4, NOTCH1, NR1D1, NR4A1, OBSCN, OLFM1, P2RX1, P…
Acox3		GO:0007264	small GTPase mediated signal transduction	GO_BiologicalProcess-EBI-UniProt-GOA_27.02.2019_00h00	2.55206e-05	0.0354736	2.66084e-05	5.32168e-05	[4, 5, 6]	Group11	7.11297	51	[AKAP13, APOE, ARFGEF3, ARHGAP25, ARHGAP4, ARHGEF10, ARHGEF12, ARHGEF18, ARHGEF40, BCAR3, C15orf62, CNKSR1, DENND4B, DNAAF3, EGR2, EPX, FBRS, FGD4, FLOT1, GPR35, GPR4, GRAP2, IQSEC1, ITGA3, ITSN1, KALRN, NCOA1, NOTCH1, OBSCN, PLEKHG2, PLEKHG4, PSD2, RAB26, RAB36, RAB3B, RAB43, RAP1GAP, RASAL1, RGL2, RHOBTB1, RHOV, RRAD, RREB1, RUNDC3A, SETX, SOS2, SRC, SYNGAP1, SYNPO2L, TRIO, WASF2]
Acss2		GO:0005089	Rho guanyl-nucleotide exchange factor activity	GO_BiologicalProcess-EBI-UniProt-GOA_27.02.2019_00h00	3.60122e-05	0.0498409	2.66084e-05	5.32168e-05	[6]	Group11	13.7255	14	[AKAP13, ARHGEF10, ARHGEF12, ARHGEF18, ARHGEF40, FGD4, ITSN1, KALRN, OBSCN, PLEKHG2, PLEKHG4, RGL2, SOS2, TRIO]
Acss3		GO:0051056	regulation of small GTPase mediated signal transduction	GO_BiologicalProcess-EBI-UniProt-GOA_27.02.2019_00h00	1.55602e-05	0.0217531	2.66084e-05	5.32168e-05	[5, 6, 7]	Group11	8.24053	37	[AKAP13, APOE, ARFGEF3, ARHGAP25, ARHGAP4, ARHGEF10, ARHGEF12, ARHGEF18, ARHGEF40, DENND4B, EGR2, EPX, FBRS, FGD4, FLOT1, GPR35, GPR4, IQSEC1, ITGA3, ITSN1, KALRN, NCOA1, NOTCH1, OBSCN, PLEKHG2, PLEKHG4, PSD2, RAP1GAP, RASAL1, RGL2, RHOBTB1, RHOV, SOS2, SRC, SYNGAP1, SYNPO2L, TRIO]
Adad2		GO:0007266	Rho protein signal transduction	GO_BiologicalProcess-EBI-UniProt-GOA_27.02.2019_00h00	3.60851e-05	0.0499057	2.66084e-05	5.32168e-05	[6, 7, 8]	Group11	9.43396	25	[AKAP13, APOE, ARHGAP4, ARHGEF10, ARHGEF12, ARHGEF18, ARHGEF40, C15orf62, CNKSR1, FGD4, FLOT1, GPR35, GPR4, ITGA3, ITSN1, KALRN, OBSCN, PLEKHG2, PLEKHG4, RHOBTB1, RHOV, SOS2, SYNPO2L, TRIO, WASF2]
Adam22		GO:0090066	regulation of anatomical structure size	GO_BiologicalProcess-EBI-UniProt-GOA_27.02.2019_00h00	2.39406e-05	0.0333253	4.03044e-13	6.04565e-12	[3]	Group12	7.32087	47	[APOE, ARHGAP4, ASPA, AVIL, BAIAP2L1, C15orf62, CASR, CD38, CDHR5, FGF23, GRIP2, KANK3, KCNMA1, L1CAM, LMOD3, MACF1, MAP1B, MAP3K13, MEGF8, MTOR, NEB, NOS1, NRCAM, OLFM1, P2RX1, PLA2G6, PLEK, PLEKHG2, PRICKLE1, RAB3B, RHOBTB1, SEMA3B, SETX, SLC12A3, SLC12A4, SLC25A23, SPP1, SPTB, SSH1, SSH3, SYCP1, SYNGAP1, TRPM4, TRPV2, TTL, WASF2, ZRSR2]
Adamts13		GO:0045595	regulation of cell differentiation	GO_BiologicalProcess-EBI-UniProt-GOA_27.02.2019_00h00	9.78835e-11	1.39484e-07	4.03044e-13	6.04565e-12	[3, 4]	Group12	6.47862	147	[AKAP13, APOE, ARFGEF3, ARHGAP4, ASPA, AVIL, BCL9L, BGLAP, BHLHA15, CACNG7, CCL17, CD38, CD80, CDSN, CHD7, CPN1, CREBBP, CRISP2, DKKL1, DLL1, DNAAF3, EGR2, EHD1, EPX, FCGR2A, FCGR2B, FCGR2C, FES, FGF23, FLOT1, FOS, FOXP3, GRHL2, HAMP, HAP1, IKBKB, IKZF3, IL23A, IL2RA, IMPACT, ITGA3, ITM2C, KALRN, KIF13B, KMT2E, L1CAM, LMO2, LMOD3, LOXL3, MACF1, MAP1B, MAP3K13, MBD1, MED12, MEGF8, MID1, MMEL1, MST…
Adamtsl4		GO:0048468	cell development	GO_BiologicalProcess-EBI-UniProt-GOA_27.02.2019_00h00	6.27556e-06	0.00882343	4.03044e-13	6.04565e-12	[3, 4]	Group12	5.49618	144	[ACHE, ADAM22, ADAMTSL4, AKAP13, ANO9, APOE, ARFGEF3, ARHGAP4, ARHGEF10, ARID5B, ASPA, AVIL, BGLAP, BHLHA15, CACNG7, CASR, CCDC169-SOHLH2, CCR6, CD38, CDSN, CFAP43, CHD6, CHD7, COL20A1, CPN1, DAZL, DLL1, DNAAF3, DZIP1, EGR2, EHD1, EPX, ETV1, FAM9A, FAM9B, FAM9C, FES, FLOT1, GPR4, GRB7, GRHL2, HAMP, HAP1, HERC1, HID1, HNF1A, HORMAD1, IFT140, IKBKB, IMPACT, ITGA3, ITM2C, KALRN, KIF13B, L1CAM, LMOD3…
Adar		GO:0048638	regulation of developmental growth	GO_BiologicalProcess-EBI-UniProt-GOA_27.02.2019_00h00	8.11525e-06	0.0114019	4.03044e-13	6.04565e-12	[3, 4]	Group12	8.55107	36	[ACACB, APOE, ARHGAP4, CACNG7, CASR, CHD7, COLQ, DLL1, HAMP, JARID2, KCNK2, L1CAM, MACF1, MAEL, MAP1B, MAP3K13, MEGF8, MST1, MTOR, NOTCH1, NRCAM, OLFM1, PARP3, PRKN, RASAL1, RNF157, SEMA3B, SGPL1, SLC25A23, SOCS2, SPP1, STAT3, TRPV2, TTL, UNC13A, WWC1]
Adcy7		GO:0022604	regulation of cell morphogenesis	GO_BiologicalProcess-EBI-UniProt-GOA_27.02.2019_00h00	2.17934e-05	0.0303582	4.03044e-13	6.04565e-12	[4, 5, 6]	Group12	7.46269	45	[APOE, ARHGAP4, ARHGEF18, BCL9L, C15orf62, CACNG7, DNAAF3, EGR2, FES, FGD4, FMNL1, KALRN, KIF13B, L1CAM, MACF1, MAP1B, MAP3K13, MED12, MEGF8, MMEL1, NCOA1, NRCAM, OLFM1, PARVB, PLXNC1, PRKN, RASAL1, RHOV, RNF157, RREB1, SBNO2, SEMA3B, SHOX2, SLC25A23, SPP1, SRC, SSH1, SSH3, SYNGAP1, TRPC6, TRPV2, TTL, UNC13A, UNC13D, ZSWIM8]
Adgrf3		GO:0120035	regulation of plasma membrane bounded cell projection organization	GO_BiologicalProcess-EBI-UniProt-GOA_27.02.2019_00h00	2.83607e-05	0.0393646	4.03044e-13	6.04565e-12	[5, 6]	Group12	6.75057	59	[APOE, ARHGAP4, ASPA, AVIL, C15orf62, CACNG7, CARD14, CD38, CDHR5, DNAAF3, DZIP1, EGR2, EHD1, EPX, FCGR2A, FCGR2B, FCGR2C, FES, HAP1, IFT140, ITGA3, ITM2C, KALRN, KIF13B, L1CAM, MACF1, MAP1B, MAP3K13, MED12, MEGF8, MMEL1, MTOR, NCOA1, NRCAM, OLFM1, PACSIN1, PLXNC1, PRKN, RAP1GAP, RASAL1, RNF157, RREB1, SBNO2, SEMA3B, SETX, SHOX2, SLC12A3, SLC25A23, SPP1, SRC, SSH1, SSH3, SYNGAP1, TRPC6, TRPV2, TT…
Adgrl1		GO:0050770	regulation of axonogenesis	GO_BiologicalProcess-EBI-UniProt-GOA_27.02.2019_00h00	5.69548e-06	0.00801354	4.03044e-13	6.04565e-12	[6, 7, 8, 9, 10, 11, 12, 13]	Group12	10.5042	25	[APOE, ARHGAP4, DNAAF3, EGR2, KIF13B, L1CAM, MACF1, MAP1B, MAP3K13, MEGF8, MMEL1, NRCAM, OLFM1, PLXNC1, SBNO2, SEMA3B, SHOX2, SLC25A23, SPP1, SSH1, SSH3, SYNGAP1, TRPV2, TTL, ZSWIM8]
Adssl1		GO:0050793	regulation of developmental process	GO_BiologicalProcess-EBI-UniProt-GOA_27.02.2019_00h00	3.91868e-09	5.58019e-06	1.60062e-12	2.24087e-11	[2, 3]	Group13	5.79114	183	[ACACB, ADGRL1, AGO2, AKAP13, APOE, ARFGEF3, ARHGAP4, ARHGEF18, ASPA, AVIL, BCL9L, BCOR, BGLAP, BHLHA15, C15orf62, CACNG7, CASR, CCL17, CD38, CD40, CD80, CDSN, CHD7, COLQ, CPN1, CREBBP, CRISP2, CXCR2, CYP1B1, DKKL1, DLL1, DNAAF3, EGR2, EHD1, EPX, FCGR2A, FCGR2B, FCGR2C, FES, FGD4, FGF23, FLOT1, FMNL1, FOS, FOXP3, GPNMB, GPR4, GRHL2, HAMP, HAP1, HNF1A, IKBKB, IKZF3, IL10, IL1RN, IL23A, IL2RA, IMPA…
Adtrp		GO:0051239	regulation of multicellular organismal process	GO_BiologicalProcess-EBI-UniProt-GOA_27.02.2019_00h00	9.17895e-07	0.0012979	1.60062e-12	2.24087e-11	[2, 3]	Group13	5.26734	199	[ABHD6, ACACB, ACHE, ADCY7, ADGRL1, ADTRP, AGO2, APOE, ARFGEF3, ARHGAP4, ASPA, ATP1B1, ATP2A3, AVIL, BCL3, BCL9L, BCOR, BGLAP, C1QTNF1, CACNA1H, CACNA1S, CACNA2D4, CACNB3, CACNG7, CARD14, CASR, CCR6, CD38, CD40, CD80, CDSN, CHD7, CHRNB4, COLQ, CORO2B, CPN1, CREBBP, CRISP2, CXCR2, CYP1B1, DDX58, DHX58, DLL1, DNAAF3, DSG2, EBI3, EGR2, EHD1, EPX, FCGR2A, FCGR2B, FCGR2C, FES, FGF23, FLOT1, FOS, FOXP3…
Aebp1		GO:0030154	cell differentiation	GO_BiologicalProcess-EBI-UniProt-GOA_27.02.2019_00h00	7.63685e-11	1.08901e-07	1.60062e-12	2.24087e-11	[3]	Group13	5.43456	267	[ACHE, ACKR2, ADAM22, ADAMTSL4, AIRE, AKAP13, ANO9, APOE, ARFGEF3, ARHGAP4, ARHGEF10, ARID5B, ASPA, ATF3, AVIL, BCL3, BCL9L, BGLAP, BHLHA15, BTBD18, CACNA1H, CACNG7, CASR, CATSPERG, CCDC169-SOHLH2, CCL17, CCR6, CD38, CD80, CDHR5, CDSN, CFAP43, CFAP54, CHD6, CHD7, COL20A1, CORO7, CPN1, CREBBP, CRISP2, DAZL, DKKL1, DLL1, DNAAF3, DNMT3A, DNMT3L, DSG2, DZIP1, EDARADD, EGR2, EHD1, EHF, EPX, ETV1, ETV6…
Aff1		GO:0051093	negative regulation of developmental process	GO_BiologicalProcess-EBI-UniProt-GOA_27.02.2019_00h00	1.13808e-05	0.0159445	1.60062e-12	2.24087e-11	[2, 3, 4]	Group13	6.35559	79	[APOE, ARHGAP4, BCOR, BGLAP, BHLHA15, CASR, CCL17, CD38, CDSN, CRISP2, DLL1, DNAAF3, FCGR2A, FCGR2B, FCGR2C, FGF23, FOXP3, GPR4, GRHL2, ITM2C, JARID2, KCNK2, LOXL3, MBD1, MST1, NFATC2, NFKBID, NOTCH1, NPR2, NR5A1, PARP3, PBLD, PIAS3, PLPP7, PRAMEF1, PRAMEF10, PRAMEF11, PRAMEF12, PRAMEF13, PRAMEF14, PRAMEF15, PRAMEF17, PRAMEF18, PRAMEF19, PRAMEF2, PRAMEF20, PRAMEF25, PRAMEF26, PRAMEF27, PRAMEF33, …
Afp		GO:0045595	regulation of cell differentiation	GO_BiologicalProcess-EBI-UniProt-GOA_27.02.2019_00h00	9.78835e-11	1.39484e-07	1.60062e-12	2.24087e-11	[3, 4]	Group13	6.47862	147	[AKAP13, APOE, ARFGEF3, ARHGAP4, ASPA, AVIL, BCL9L, BGLAP, BHLHA15, CACNG7, CCL17, CD38, CD80, CDSN, CHD7, CPN1, CREBBP, CRISP2, DKKL1, DLL1, DNAAF3, EGR2, EHD1, EPX, FCGR2A, FCGR2B, FCGR2C, FES, FGF23, FLOT1, FOS, FOXP3, GRHL2, HAMP, HAP1, IKBKB, IKZF3, IL23A, IL2RA, IMPACT, ITGA3, ITM2C, KALRN, KIF13B, KMT2E, L1CAM, LMO2, LMOD3, LOXL3, MACF1, MAP1B, MAP3K13, MBD1, MED12, MEGF8, MID1, MMEL1, MST…
Agl		GO:0048468	cell development	GO_BiologicalProcess-EBI-UniProt-GOA_27.02.2019_00h00	6.27556e-06	0.00882343	1.60062e-12	2.24087e-11	[3, 4]	Group13	5.49618	144	[ACHE, ADAM22, ADAMTSL4, AKAP13, ANO9, APOE, ARFGEF3, ARHGAP4, ARHGEF10, ARID5B, ASPA, AVIL, BGLAP, BHLHA15, CACNG7, CASR, CCDC169-SOHLH2, CCR6, CD38, CDSN, CFAP43, CHD6, CHD7, COL20A1, CPN1, DAZL, DLL1, DNAAF3, DZIP1, EGR2, EHD1, EPX, ETV1, FAM9A, FAM9B, FAM9C, FES, FLOT1, GPR4, GRB7, GRHL2, HAMP, HAP1, HERC1, HID1, HNF1A, HORMAD1, IFT140, IKBKB, IMPACT, ITGA3, ITM2C, KALRN, KIF13B, L1CAM, LMOD3…
Ago2		GO:0045596	negative regulation of cell differentiation	GO_BiologicalProcess-EBI-UniProt-GOA_27.02.2019_00h00	2.32906e-06	0.00328631	1.60062e-12	2.24087e-11	[3, 4, 5]	Group13	7.07291	65	[APOE, ARHGAP4, BGLAP, BHLHA15, CCL17, CD38, CDSN, DLL1, DNAAF3, FCGR2A, FCGR2B, FCGR2C, FGF23, FOXP3, GRHL2, ITM2C, LOXL3, MBD1, NFATC2, NFKBID, NOTCH1, NPR2, PBLD, PIAS3, PLPP7, PRAMEF1, PRAMEF10, PRAMEF11, PRAMEF12, PRAMEF13, PRAMEF14, PRAMEF15, PRAMEF17, PRAMEF18, PRAMEF19, PRAMEF2, PRAMEF20, PRAMEF25, PRAMEF26, PRAMEF27, PRAMEF33, PRAMEF4, PRAMEF5, PRAMEF6, PRAMEF7, PRAMEF8, PRAMEF9, PRICKLE…
Ahdc1		GO:0120035	regulation of plasma membrane bounded cell projection organization	GO_BiologicalProcess-EBI-UniProt-GOA_27.02.2019_00h00	2.83607e-05	0.0393646	1.60062e-12	2.24087e-11	[5, 6]	Group13	6.75057	59	[APOE, ARHGAP4, ASPA, AVIL, C15orf62, CACNG7, CARD14, CD38, CDHR5, DNAAF3, DZIP1, EGR2, EHD1, EPX, FCGR2A, FCGR2B, FCGR2C, FES, HAP1, IFT140, ITGA3, ITM2C, KALRN, KIF13B, L1CAM, MACF1, MAP1B, MAP3K13, MED12, MEGF8, MMEL1, MTOR, NCOA1, NRCAM, OLFM1, PACSIN1, PLXNC1, PRKN, RAP1GAP, RASAL1, RNF157, RREB1, SBNO2, SEMA3B, SETX, SHOX2, SLC12A3, SLC25A23, SPP1, SRC, SSH1, SSH3, SYNGAP1, TRPC6, TRPV2, TT…
Aire		GO:0022412	cellular process involved in reproduction in multicellular organism	GO_BiologicalProcess-EBI-UniProt-GOA_27.02.2019_00h00	4.54241e-09	6.46384e-06	2.8128e-06	2.8128e-05	[2, 3]	Group14	9.91379	46	[ASPA, BTBD18, CASR, CCDC169-SOHLH2, CCR6, CFAP43, CHD6, DAZL, DNMT3A, DNMT3L, DPEP3, DZIP1, ETV6, FAM9A, FAM9B, FAM9C, FKBP6, HID1, HORMAD1, IZUMO1, KALRN, M1AP, MAEL, MOV10L1, MTOR, NCOA1, NPR2, PIWIL2, PIWIL4, PRDM1, RARA, REC8, SLC2A12, SMARCA2, SOHLH2, SPO11, SPTB, SRC, STRA8, SYCP1, TCP11, TDRD9, TEX14, TEX19, TOPAZ1, ZMIZ1]
Ajm1		GO:0044703	multi-organism reproductive process	GO_BiologicalProcess-EBI-UniProt-GOA_27.02.2019_00h00	2.48176e-07	0.000351914	2.8128e-06	2.8128e-05	[2, 3]	Group14	6.75466	87	[ACOX1, ADCY7, AFP, AGO2, ASPA, BTBD18, C1QTNF1, CACNA1H, CASR, CATSPERG, CCDC169-SOHLH2, CCR6, CD38, CFAP43, CFAP54, CHD6, CLGN, DAZL, DKKL1, DNMT3A, DNMT3L, DPEP3, DSG2, DZIP1, EPX, ETV6, FAM9A, FAM9B, FAM9C, FKBP6, FOS, HID1, HORMAD1, HVCN1, ITGA3, IZUMO1, JAG2, KALRN, M1AP, MAEL, MERTK, MOV10L1, MST1, MTOR, MYCBPAP, MYO1A, NCOA1, NOTCH1, NPR2, NR1D1, P2RX1, PCYT1A, PIWIL2, PIWIL4, PLA2G6, PRD…
Akap13		GO:0048609	multicellular organismal reproductive process	GO_BiologicalProcess-EBI-UniProt-GOA_27.02.2019_00h00	2.43384e-06	0.00343172	2.8128e-06	2.8128e-05	[2, 3]	Group14	6.80336	73	[ACOX1, ADCY7, AFP, ASPA, BTBD18, CASR, CATSPERG, CCDC169-SOHLH2, CCR6, CFAP43, CFAP54, CHD6, DAZL, DKKL1, DNMT3A, DNMT3L, DPEP3, DSG2, DZIP1, ETV6, FAM9A, FAM9B, FAM9C, FKBP6, HID1, HORMAD1, ITGA3, JAG2, KALRN, M1AP, MAEL, MERTK, MOV10L1, MST1, MTOR, MYCBPAP, MYO1A, NCOA1, NOTCH1, NPR2, NR1D1, NR5A1, P2RX1, PIWIL2, PIWIL4, PLA2G6, PRDM1, RAI14, RARA, REC8, RHOXF1, RPL10L, SBNO2, SETX, SGPL1, SLC…
Aldh1a3		GO:0051321	meiotic cell cycle	GO_BiologicalProcess-EBI-UniProt-GOA_27.02.2019_00h00	2.0981e-05	0.0292476	2.8128e-06	2.8128e-05	[2, 3]	Group14	9.09091	29	[BTBD18, DNMT3L, DPEP3, FAM9A, FAM9B, FAM9C, FKBP6, HID1, HORMAD1, M1AP, MAEL, MOV10L1, MSH5, NPR2, PIWIL2, PIWIL4, REC114, REC8, RRAD, SLC2A12, SPO11, STAG3, STRA8, SYCP1, TDRD9, TEX14, TEX19, TOPAZ1, ZNF318]
Aldh1l2		GO:0019953	sexual reproduction	GO_BiologicalProcess-EBI-UniProt-GOA_27.02.2019_00h00	3.10054e-07	0.000439347	2.8128e-06	2.8128e-05	[2, 3, 4]	Group14	7.04356	76	[ACOX1, AFP, ASPA, BTBD18, CACNA1H, CASR, CATSPERG, CCDC169-SOHLH2, CCR6, CFAP43, CFAP54, CHD6, CLGN, DAZL, DKKL1, DNMT3A, DNMT3L, DPEP3, DZIP1, ETV6, FAM9A, FAM9B, FAM9C, FKBP6, HID1, HORMAD1, HVCN1, IZUMO1, JAG2, KALRN, M1AP, MAEL, MERTK, MOV10L1, MST1, MTOR, MYCBPAP, MYO1A, NCOA1, NOTCH1, NPR2, NR1D1, P2RX1, PCYT1A, PIWIL2, PIWIL4, PRDM1, RAI14, RARA, REC8, RHOXF1, RPL10L, SBNO2, SETX, SGPL1, …
Alpk1		GO:0007276	gamete generation	GO_BiologicalProcess-EBI-UniProt-GOA_27.02.2019_00h00	1.5683e-06	0.00221444	2.8128e-06	2.8128e-05	[3, 4, 5]	Group14	7.1991	64	[ACOX1, AFP, ASPA, BTBD18, CASR, CATSPERG, CCDC169-SOHLH2, CCR6, CFAP43, CFAP54, CHD6, DAZL, DNMT3A, DNMT3L, DPEP3, DZIP1, ETV6, FAM9A, FAM9B, FAM9C, FKBP6, HID1, HORMAD1, JAG2, KALRN, M1AP, MAEL, MERTK, MOV10L1, MST1, MTOR, MYCBPAP, MYO1A, NCOA1, NOTCH1, NPR2, PIWIL2, PIWIL4, PRDM1, RAI14, RARA, REC8, RHOXF1, RPL10L, SBNO2, SETX, SGPL1, SLC2A12, SMARCA2, SOHLH2, SPEF2, SPO11, SPTB, SRC, STRA8, S…
Ankib1		GO:0007281	germ cell development	GO_BiologicalProcess-EBI-UniProt-GOA_27.02.2019_00h00	2.53166e-05	0.0352154	2.8128e-06	2.8128e-05	[3, 4, 5, 6]	Group14	8.79765	30	[ASPA, CCDC169-SOHLH2, CCR6, CFAP43, CHD6, DAZL, DZIP1, FAM9A, FAM9B, FAM9C, HID1, HORMAD1, KALRN, MOV10L1, MTOR, NCOA1, NPR2, PIWIL2, PRDM1, RARA, REC8, SMARCA2, SOHLH2, SPO11, SPTB, SRC, STRA8, SYCP1, TCP11, TOPAZ1]
Ankrd12		GO:0007140	male meiotic nuclear division	GO_BiologicalProcess-EBI-UniProt-GOA_27.02.2019_00h00	1.50974e-07	0.000214534	2.8128e-06	2.8128e-05	[3, 4, 5, 6, 7]	Group14	23.2143	13	[BTBD18, DNMT3L, DPEP3, HID1, M1AP, MAEL, MOV10L1, REC8, SLC2A12, SPO11, TDRD9, TEX14, TEX19]
Ankrd23		GO:0048232	male gamete generation	GO_BiologicalProcess-EBI-UniProt-GOA_27.02.2019_00h00	3.24897e-06	0.0045778	2.8128e-06	2.8128e-05	[4, 5, 6]	Group14	7.51773	53	[ACOX1, ASPA, BTBD18, CATSPERG, CCDC169-SOHLH2, CCR6, CFAP43, CFAP54, CHD6, DAZL, DNMT3A, DNMT3L, DPEP3, DZIP1, FAM9A, FAM9B, FAM9C, FKBP6, HID1, HORMAD1, JAG2, KALRN, M1AP, MAEL, MERTK, MOV10L1, MST1, MYCBPAP, MYO1A, NOTCH1, PIWIL2, PIWIL4, RAI14, RARA, REC8, RPL10L, SBNO2, SETX, SGPL1, SLC2A12, SMARCA2, SOHLH2, SPEF2, SPO11, STRA8, SYCP1, SYNE1, TAF7L, TCP11, TDRD9, TEX14, TEX19, TOPAZ1]
Ankrd33b		GO:0007141	male meiosis I	GO_BiologicalProcess-EBI-UniProt-GOA_27.02.2019_00h00	1.28557e-05	0.017998	2.8128e-06	2.8128e-05	[4, 5, 6, 7, 8]	Group14	26.6667	8	[BTBD18, DNMT3L, HID1, MOV10L1, REC8, SLC2A12, SPO11, TDRD9]
Ano5		GO:0007283	spermatogenesis	GO_BiologicalProcess-EBI-UniProt-GOA_27.02.2019_00h00	1.58216e-05	0.0221028	2.8128e-06	2.8128e-05	[5, 6, 7]	Group14	7.30994	50	[ACOX1, ASPA, BTBD18, CATSPERG, CCDC169-SOHLH2, CCR6, CFAP43, CFAP54, CHD6, DAZL, DNMT3A, DNMT3L, DZIP1, FAM9A, FAM9B, FAM9C, FKBP6, HID1, HORMAD1, JAG2, KALRN, M1AP, MAEL, MERTK, MOV10L1, MST1, MYCBPAP, MYO1A, NOTCH1, PIWIL2, PIWIL4, RAI14, RARA, REC8, RPL10L, SBNO2, SETX, SGPL1, SMARCA2, SOHLH2, SPEF2, SPO11, STRA8, SYCP1, SYNE1, TAF7L, TCP11, TDRD9, TEX19, TOPAZ1]
Ano7
Ano9
Apoe
Arfgef3
Arhgap25
Arhgap4
Arhgef10
Arhgef12
Arhgef18
Arhgef40
Arid3a
Arid3b
Arid5b
Arl10
Arl14epl
Art1
Art5
Aspa
Atf3
Atg2a
Atg9a
Atp1b1
Atp2a3
Atp6v0a1
Atp8b2
Atp9a
AU015836
Avil
B4galnt4
Baiap2l1
Baz2b
BC051142
Bcar3
Bcl3
Bcl9l
Bcor
Bcorl1
Bend5
Bglap3
Bhlha15
Bhmt2
Bicra
Bsdc1
Btbd18
C1qtnf1
C530008M17Rik
Cabin1
Cacna1h
Cacna1s
Cacna2d4
Cacnb3
Cacng7
Calcoco1
Car4
Card14
Carmil3
Casr
Castor2
Catsperg1
Cblc
Ccdc106
Ccdc122
Ccdc130
Ccdc28b
Ccdc38
Ccl17
Ccnd2
Ccr6
Ccser2
Cd22
Cd300lf
Cd38
Cd40
Cd72
Cd80
Cdc42bpg
Cdhr5
Cdsn
Cep164
Cep350
Cfap43
Cfap54
Cfap74
Chd3
Chd4
Chd6
Chd7
Chd9
Chrnb4
Chst10
Chst15
Ciart
Ciita
Cks1brt
Clca1
Clcn5
Clcnkb
Clgn
Clip2
Cln8
Clvs1
Cmya5
Cnksr1
Col20a1
Col6a5
Colq
Coq8a
Coro2b
Coro7
Cox6a2
Cplane1
Cpn1
Crebbp
Crisp2
Crtc3
Csad
Csf2rb
Csn3
Csnk1g1
Cxcr2
Cxcr5
Cyb561
Cyb5r2
Cyp1b1
Cyp2b10
Cyp2c55
Cyp4f16
D430019H16Rik
Dapp1
Dazl
Ddx58
Dennd1c
Dennd4b
Dgkq
Dhx57
Dhx58
Dkkl1
Dll1
Dnaaf3
Dnah10
Dnah9
Dnmt3a
Dnmt3l
Dop1b
Dpep3
Dppa5a
Dsg2
Dusp16
Dzip1
Ebf1
Ebi3
Edaradd
Edem1
Efcab3
Egr2
Ehd1
Ehf
Eno4
Enpp3
Enpp6
Enthd1
Epx
Esx1
Etv1
Etv6
Fam129c
Fam160a1
Fat3
Fbrs
Fbxo11
Fbxw9
Fcgr2b
Fcrla
Fes
Fgd4
Fgf23
Filip1l
Fjx1
Fkbp6
Flot1
Fmnl1
Fnbp1
Fndc7
Fos
Foxn3
Foxp3
Foxp4
Frs3
Fsd2
Fuca1
Furin
Gabbr1
Galnt6
Gba
Gbp9
Gem
Ggt7
Gimap8
Glis2
Gm1140
Gm11639
Gm14137
Gm18336
Gm29776
Gm38393
Gm4779
Gm5039
Gm6880
Gm6890
Gm973
Gns
Golgb1
Got1l1
Gpat2
Gpatch2l
Gpcpd1
Gpnmb
Gpr179
Gpr35
Gpr4
Gramd1b
Gramd1c
Gramd2
Grap2
Grb7
Grhl2
Grik5
Grip2
Gsdma3
Gse1
Gtpbp2
Gtsf1l
Hamp2
Hap1
Hapln1
Hdc
Herc1
Herc3
Hid1
Hif3a
Hist2h2aa2
Hivep1
Hivep3
Hjv
Hkdc1
Hnf1a
Hormad1
Hvcn1
Hyou1
Ick
Iffo1
Ift140
Ikbkb
Ikzf3
Il10
Il1r2
Il1rn
Il23a
Il2ra
Il4i1
Ildr1
Impact
Inpp4a
Iqsec1
Irak2
Irgm1
Itga3
Itgbl1
Itln1
Itm2c
Itpr1
Itpr2
Itsn1
Izumo1
Jag2
Jarid2
Jsrp1
Kalrn
Kank3
Kat6b
Kbtbd11
Kcnab3
Kcnj15
Kcnk2
Kcnk6
Kcnma1
Kdm6b
Khk
Kif13b
Kif1a
Klc2
Klf12
Klhdc1
Klhl3
Kmt2e
Krba1
Kremen2
L1cam
Lama3
Lamc2
Laptm5
Leng9
Lgals8
Lime1
Liph
Lmbr1l
Lmo2
Lmod3
Loxl3
Lpo
Lrch1
Lrg1
Lrp1b
Lrp2bp
Lrsam1
Lsmem2
Ly6k
Lyst
M1ap
Macf1
Mael
Mageb16
Mageb4
Man1a
Man2a2
Map1b
Map3k1
Map3k13
Map4k2
Mapkbp1
Mapre3
Matk
Matn1
Matn4
Mbd1
Med12
Megf8
Meis3
Mertk
Mgat4a
Mical3
Mid1
Mid2
Mmel1
Morn1
Morn4
Mov10l1
Mpv17l
Mroh2a
Mrtfa
Msh5
Mst1
Mtmr4
Mtor
Mtus2
Mvp
Mx2
Mycbpap
Mylk2
Myo15b
Myo1a
Myo1g
Myo1h
Myt1l
N4bp2
Naaa
Naalad2
Nacad
Nckap5l
Ncoa1
Neb
Nfat5
Nfatc2
Nfkbid
Nfkbiz
Nhlrc3
Nhsl2
Nipal3
Nlgn2
Nlrc3
Nlrc4
Nlrp4c
Nol4l
Nos1
Notch1
Npr2
Nr1d1
Nr4a1
Nr5a1
Nrcam
Nsd1
Nudt12
Nutm1
Nyx
Oas3
Oasl1
Obscn
Olfm1
Osm
Otog
Otx1
P2rx1
Pacsin1
Parp3
Parvb
Patj
Pbld1
Pced1b
Pcmtd1
Pcyt1a
Pde1b
Pde1c
Pdk2
Pdk4
Pdlim3
Penk
Pet2
Phf21a
Phkg1
Phlda3
Phldb3
Phyhd1
Pias3
Pigr
Pik3cg
Pik3ip1
Pip5k1c
Pitpnm1
Piwil2
Piwil4
Pkd1l2
Pkp3
Pla2g5
Pla2g6
Plcg1
Plec
Plek
Plekhb2
Plekhd1
Plekhg2
Plekhg4
Plgrkt
Plpp5
Plpp7
Pltp
Plxnc1
Pnma3
Polm
Polr2a
Pou2f2
Ppef2
Ppfia3
Ppfia4
Ppip5k1
Ppp1r32
Ppp1r3a
Ppp6r2
Pramel1
Prdm1
Prickle1
Prkn
Pros1
Prrc2b
Prss48
Psd2
Psme2b
Ptpn7
Pygm
Rab26
Rab36
Rab3b
Rab43
Rai14
Rap1gap
Rara
Rasal1
Rasef
Rbl2
Rbm24
Rbm44
Rcan3
Rec114
Rec8
Reep3
Rgl2
Rhobtb1
Rhov
Rhox13
Ric1
Rint1
Rnf157
Rnf183
Rnf38
Rpgrip1
Rpl10l
Rpl3l
Rrad
Rragd
Rreb1
Rundc3a
Runx3
Ryr3
Sag
Samd11
Sapcd1
Sbno2
Scn2b
Scn4a
Scyl3
Sec14l2
Sec31b
Sel1l
Sema3b
Serinc2
Setd1b
Setx
Sfi1
Sgca
Sgip1
Sgms1
Sgpl1
Sh2b3
Shisa7
Shox2
Sidt2
Sik1
Sirt5
Slc12a3
Slc12a4
Slc18a1
Slc22a15
Slc23a1
Slc25a21
Slc25a23
Slc25a31
Slc26a10
Slc27a1
Slc2a12
Slc2a5
Slc30a7
Slc38a10
Slc47a1
Slc4a5
Slc4a8
Slc6a13
Slc6a6
Slc7a3
Slc7a7
Slc9b1
Slfn5
Slfn8
Slk
Slpi
Smarca2
Smarcd3
Snrpn
Snurf
Snx11
Socs2
Sohlh2
Sorl1
Sos2
Spef2
Spo11
Spock2
Spp1
Spred2
Sptb
Src
Srgn
Srl
Srp72
Ssh1
Ssh3
Sspo
St3gal6
Stag3
Stat3
Stk31
Stoml1
Stra8
Strc
Suco
Sv2a
Sycp1
Syk
Syna
Syne1
Syngap1
Synj1
Synpo2l
Sytl3
Tacc1
Taf7l
Taf9b
Tank
Taok3
Tbx4
Tcp11
Tdrd9
Tex101
Tex13b
Tex14
Tex19.1
Tex9
Tfcp2l1
Tgfbi
Tgm1
Ticam1
Tln1
Tm4sf5
Tmc3
Tmcc3
Tmem131
Tmem136
Tmem151b
Tmem154
Tmem173
Tmem26
Tmem63b
Tmem8b
Tnfrsf13b
Tnnt1
Tnnt2
Tnrc6b
Topaz1
Trabd2b
Traf1
Tram2
Trim30a
Trim63
Trim7
Trio
Trpc6
Trpm4
Trpv2
Ttl
Tuba3a
Tuba3b
Tuba8
Tubb4a
Tulp2
Txndc5
Ubl3
Ubr3
Ubr4
Ubxn11
Unc119
Unc13a
Unc13d
Unc93a
Upb1
Upf3b
Upk1b
Uso1
Usp18
Usp32
Usp35
Vxn
Wasf2
Wdr60
Wfikkn2
Wnt6
Wsb2
Wwc1
Xaf1
Xdh
Xlr5c
Xpnpep1
Zbtb32
Zc3h12a
Zc3h12d
Zc3h7a
Zfp318
Zfp385a
Zfp512b
Zfp575
Zfp61
Zfp750
Zfp945
Zkscan5
Zmiz1
Zrsr1
Zscan29
Zswim8
Zyx
Zzef1

## Sheet: Table S7
Protein Name	ECM Class	ECM Type
COL10A1	Core matrisome	Collagens
COL12A1	Core matrisome	Collagens
COL14A1	Core matrisome	Collagens
COL15A1	Core matrisome	Collagens
COL18A1	Core matrisome	Collagens
COL1A1	Core matrisome	Collagens
COL1A2	Core matrisome	Collagens
COL3A1	Core matrisome	Collagens
COL4A1	Core matrisome	Collagens
COL4A2	Core matrisome	Collagens
COL5A2	Core matrisome	Collagens
COL5A3	Core matrisome	Collagens
COL6A1	Core matrisome	Collagens
COL6A2	Core matrisome	Collagens
COL6A3	Core matrisome	Collagens
COL6A6	Core matrisome	Collagens
COL7A1	Core matrisome	Collagens
AEBP1	Core matrisome	ECM Glycoproteins
CILP	Core matrisome	ECM Glycoproteins
COCH	Core matrisome	ECM Glycoproteins
DPT	Core matrisome	ECM Glycoproteins
EFEMP1	Core matrisome	ECM Glycoproteins
EFEMP2	Core matrisome	ECM Glycoproteins
ELN	Core matrisome	ECM Glycoproteins
EMILIN1	Core matrisome	ECM Glycoproteins
EMILIN2	Core matrisome	ECM Glycoproteins
FBLN2	Core matrisome	ECM Glycoproteins
FBN1	Core matrisome	ECM Glycoproteins
FGA	Core matrisome	ECM Glycoproteins
FGB	Core matrisome	ECM Glycoproteins
FGG	Core matrisome	ECM Glycoproteins
FGL2	Core matrisome	ECM Glycoproteins
FN1	Core matrisome	ECM Glycoproteins
LAMA4	Core matrisome	ECM Glycoproteins
LAMA5	Core matrisome	ECM Glycoproteins
LAMB1	Core matrisome	ECM Glycoproteins
LAMB2	Core matrisome	ECM Glycoproteins
LAMC1	Core matrisome	ECM Glycoproteins
LTBP2	Core matrisome	ECM Glycoproteins
MATN2	Core matrisome	ECM Glycoproteins
MFAP2	Core matrisome	ECM Glycoproteins
MFAP4	Core matrisome	ECM Glycoproteins
MFGE8	Core matrisome	ECM Glycoproteins
MMRN2	Core matrisome	ECM Glycoproteins
MXRA5	Core matrisome	ECM Glycoproteins
NID1	Core matrisome	ECM Glycoproteins
NID2	Core matrisome	ECM Glycoproteins
POSTN	Core matrisome	ECM Glycoproteins
TGFBI	Core matrisome	ECM Glycoproteins
THBS2	Core matrisome	ECM Glycoproteins
TNC	Core matrisome	ECM Glycoproteins
VTN	Core matrisome	ECM Glycoproteins
VWA1	Core matrisome	ECM Glycoproteins
VWF	Core matrisome	ECM Glycoproteins
ASPN	Core matrisome	Proteoglycans
BGN	Core matrisome	Proteoglycans
DCN	Core matrisome	Proteoglycans
FMOD	Core matrisome	Proteoglycans
HSPG2	Core matrisome	Proteoglycans
LUM	Core matrisome	Proteoglycans
OGN	Core matrisome	Proteoglycans
PRELP	Core matrisome	Proteoglycans
PRG2	Core matrisome	Proteoglycans
PRG3	Core matrisome	Proteoglycans
VCAN	Core matrisome	Proteoglycans
A2M	Matrisome-associated	ECM Regulators
ADAM10	Matrisome-associated	ECM Regulators
AGT	Matrisome-associated	ECM Regulators
CPN2	Matrisome-associated	ECM Regulators
CST3	Matrisome-associated	ECM Regulators
CSTB	Matrisome-associated	ECM Regulators
CTSA	Matrisome-associated	ECM Regulators
CTSB	Matrisome-associated	ECM Regulators
CTSC	Matrisome-associated	ECM Regulators
CTSD	Matrisome-associated	ECM Regulators
CTSG	Matrisome-associated	ECM Regulators
CTSS	Matrisome-associated	ECM Regulators
CTSZ	Matrisome-associated	ECM Regulators
ELANE	Matrisome-associated	ECM Regulators
F13A1	Matrisome-associated	ECM Regulators
F2	Matrisome-associated	ECM Regulators
HRG	Matrisome-associated	ECM Regulators
ITIH1	Matrisome-associated	ECM Regulators
ITIH4	Matrisome-associated	ECM Regulators
KNG1	Matrisome-associated	ECM Regulators
MMP14	Matrisome-associated	ECM Regulators
MMP9	Matrisome-associated	ECM Regulators
P4HA1	Matrisome-associated	ECM Regulators
PLG	Matrisome-associated	ECM Regulators
PLOD1	Matrisome-associated	ECM Regulators
PLOD3	Matrisome-associated	ECM Regulators
SERPINA1	Matrisome-associated	ECM Regulators
SERPINA3	Matrisome-associated	ECM Regulators
SERPINB1	Matrisome-associated	ECM Regulators
SERPINB6	Matrisome-associated	ECM Regulators
SERPINB9	Matrisome-associated	ECM Regulators
SERPIND1	Matrisome-associated	ECM Regulators
SERPINF1	Matrisome-associated	ECM Regulators
SERPING1	Matrisome-associated	ECM Regulators
SERPINH1	Matrisome-associated	ECM Regulators
TGM2	Matrisome-associated	ECM Regulators
TIMP3	Matrisome-associated	ECM Regulators
ANXA1	Matrisome-associated	ECM-affiliated Proteins
ANXA11	Matrisome-associated	ECM-affiliated Proteins
ANXA3	Matrisome-associated	ECM-affiliated Proteins
ANXA4	Matrisome-associated	ECM-affiliated Proteins
ANXA5	Matrisome-associated	ECM-affiliated Proteins
ANXA6	Matrisome-associated	ECM-affiliated Proteins
ANXA7	Matrisome-associated	ECM-affiliated Proteins
C1QA	Matrisome-associated	ECM-affiliated Proteins
C1QB	Matrisome-associated	ECM-affiliated Proteins
C1QC	Matrisome-associated	ECM-affiliated Proteins
HPX	Matrisome-associated	ECM-affiliated Proteins
LGALS1	Matrisome-associated	ECM-affiliated Proteins
LGALS3	Matrisome-associated	ECM-affiliated Proteins
LGALS9	Matrisome-associated	ECM-affiliated Proteins
LMAN1	Matrisome-associated	ECM-affiliated Proteins
PLXNB2	Matrisome-associated	ECM-affiliated Proteins
SEMA4A	Matrisome-associated	ECM-affiliated Proteins
CRLF3	Matrisome-associated	Secreted Factors
EBI3	Matrisome-associated	Secreted Factors
HCFC1	Matrisome-associated	Secreted Factors
IL16	Matrisome-associated	Secreted Factors
IL18	Matrisome-associated	Secreted Factors
S100A10	Matrisome-associated	Secreted Factors
S100A11	Matrisome-associated	Secreted Factors
S100A13	Matrisome-associated	Secreted Factors
S100A4	Matrisome-associated	Secreted Factors
S100A6	Matrisome-associated	Secreted Factors
S100A8	Matrisome-associated	Secreted Factors
S100A9	Matrisome-associated	Secreted Factors
